# Supplementary material for: Exploration of Microbial Community Diversity and Bioactive Substances during Fermentation of Mulberry Jiaosu, an Edible Naturally Fermented Mulberry Product
Source: MDPI journal article supplement (doi:10.3390/fermentation9100910), 2023-10-16
Supplement: s1 [file s1]

**Table S1.** Dynamic change of organic acids during the fermentation of mulberry Jiaosu

(g/L).

| Time/d | Oxalic acid                 | Tartaric acid                | Pyruvic acid                | Malic acid                 | Lactic acid                  | Acetic acid                | Citric acid                  | Succinic acid               | Total content                |
|--------|-----------------------------|------------------------------|-----------------------------|----------------------------|------------------------------|----------------------------|------------------------------|-----------------------------|------------------------------|
| 0      | 0.23±0.0<br>0 <sup>b</sup>  | 8.51±0.2<br>2 <sup>a</sup>   | 0±0 <sup>a</sup>            | 0.07±<br>0.00 <sup>a</sup> | 0.46±0.0<br>1 <sup>a</sup>   | 0.77±0.0<br>3 <sup>a</sup> | 3.56±0.1<br>5 <sup>bcd</sup> | 0.40±0.0<br>0 <sup>a</sup>  | 14.00±0.<br>40 <sup>a</sup>  |
| 5      | 0.25±0.0<br>0 <sup>cd</sup> | 9.30±0.5<br>4 <sup>bc</sup>  | 0±0 <sup>a</sup>            | 0.07±<br>0.00 <sup>a</sup> | 1.00±0.1<br>8 <sup>a</sup>   | 1.34±0.0<br>3 <sup>b</sup> | 3.82±0.0<br>6 <sup>def</sup> | 0.67±0.0<br>8 <sup>b</sup>  | 16.44±0.<br>74 <sup>b</sup>  |
| 10     | 0.22±0.0<br>0 <sup>a</sup>  | 8.91±0.1<br>2 <sup>ab</sup>  | 0±0 <sup>a</sup>            | 0.13±<br>0.00 <sup>b</sup> | 7.81±0.2<br>7 <sup>b</sup>   | 5.09±0.0<br>6 <sup>c</sup> | 3.29±0.1<br>3 <sup>ab</sup>  | 1.37±0.0<br>8 <sup>c</sup>  | 26.82±0.<br>24 <sup>c</sup>  |
| 15     | 0.24±0.0<br>1 <sup>bc</sup> | 9.56±0.3<br>1 <sup>cd</sup>  | 0.11±0.0<br>0 <sup>b</sup>  | 0.26±<br>0.02 <sup>c</sup> | 11.10±0.<br>39 <sup>cd</sup> | 7.58±0.3<br>9 <sup>e</sup> | 3.57±0.2<br>0 <sup>bcd</sup> | 1.59±0.0<br>7 <sup>d</sup>  | 33.99±0.<br>53 <sup>d</sup>  |
| 30     | 0.28±0.0<br>1 <sup>f</sup>  | 11.02±0.<br>27 <sup>g</sup>  | 0.16±0.0<br>0 <sup>de</sup> | 0.59±0.0<br>2 <sup>h</sup> | 13.00±0.<br>74 <sup>f</sup>  | 9.63±0.3<br>2 <sup>g</sup> | 3.11±0.2<br>0 <sup>a</sup>   | 2.12±0.1<br>2 <sup>ef</sup> | 39.91±0.<br>99 <sup>i</sup>  |
| 80     | 0.25±0.0<br>1 <sup>d</sup>  | 10.19±0.<br>39 <sup>ef</sup> | 0.15±0.0<br>0 <sup>d</sup>  | 0.39±0.0<br>2 <sup>d</sup> | 11.1±0.6<br>9 <sup>cd</sup>  | 7.05±0.5<br>3 <sup>d</sup> | 3.80±0.1<br>1 <sup>def</sup> | 2.57±0.1<br>0 <sup>g</sup>  | 35.51±1.<br>19 <sup>ef</sup> |

Data is presented as means ± standard deviations (n = 3). Different letters within a column

are significantly different statistically (P&lt;0.05).

**Table S2.** Dynamic changes of free amino acids during the fermentation of mulberry Jiaosu (mg/100g).

| Time<br>s/d | Aspartic<br>acid     | Glutamic<br>acid     | Serine                             | Glycine                           | Histidine                        | Arginine                          | Threonine                          | Alanine                          | Proline              | Tyrosine                          | Valine               | Methionine                       | Cysteine                        | Isoleucine                      | Leucine                         | Phenylalanine <sup>*</sup>   | Lysine                            | Total<br>amino<br>acids            |
|-------------|----------------------|----------------------|------------------------------------|-----------------------------------|----------------------------------|-----------------------------------|------------------------------------|----------------------------------|----------------------|-----------------------------------|----------------------|----------------------------------|---------------------------------|---------------------------------|---------------------------------|------------------------------|-----------------------------------|------------------------------------|
| 0           | 37.80<br>±1.25<br>a  | 29.47<br>±0.49<br>a  | 479.7<br>1±20.<br>31 <sup>a</sup>  | 416.0<br>2±16.<br>34 <sup>a</sup> | 178.1<br>9±6.6<br>4 <sup>a</sup> | 382.0<br>3±12.<br>31 <sup>a</sup> | 112.3<br>6±2.0<br>3 <sup>ab</sup>  | 101.7<br>0±3.2<br>1 <sup>a</sup> | 49.79<br>±2.06<br>a  | 515.2<br>7±32.<br>48 <sup>a</sup> | 26.05<br>±1.06<br>a  | 204.3<br>9±6.3<br>4 <sup>a</sup> | 0.51<br>±0.0<br>1 <sup>a</sup>  | 10.7<br>8±0.<br>32 <sup>a</sup> | 19.3<br>8±0.<br>86 <sup>a</sup> | 85.97±<br>9.42 <sup>ab</sup> | 184.3<br>0±6.0<br>7 <sup>a</sup>  | 2833.7<br>5±31.6<br>3 <sup>a</sup> |
| 5           | 39.03<br>±0.85<br>a  | 31.05<br>±1.23<br>a  | 379.2<br>3±15.<br>16 <sup>b</sup>  | 198.4<br>6±9.3<br>2 <sup>b</sup>  | 145.3<br>2±5.2<br>4 <sup>b</sup> | 407.0<br>3±16.<br>27 <sup>a</sup> | 109.3<br>7±3.9<br>5 <sup>a</sup>   | 115.4<br>1±5.6<br>2 <sup>b</sup> | 44.63<br>±0.98<br>b  | 284.2<br>7±10.<br>98 <sup>b</sup> | 35.59<br>±1.62<br>b  | 174.1<br>1±8.9<br>3 <sup>b</sup> | 1.01<br>±0.0<br>1 <sup>ab</sup> | 17.6<br>8±0.<br>37 <sup>b</sup> | 32.0<br>3±1.<br>37 <sup>b</sup> | 80.77±<br>2.82 <sup>a</sup>  | 223.3<br>2±8.2<br>4 <sup>b</sup>  | 2318.3<br>0±7.42<br>b              |
| 10          | 51.49<br>±1.75<br>b  | 59.59<br>±2.20<br>b  | 339.0<br>3±10.<br>26 <sup>c</sup>  | 158.3<br>9±6.9<br>8 <sup>de</sup> | 42.22<br>±1.32<br>g              | 447.6<br>3±22.<br>10 <sup>b</sup> | 109.9<br>7±3.9<br>9 <sup>a</sup>   | 144.7<br>7±8.0<br>6 <sup>c</sup> | 31.29<br>±1.36<br>c  | 281.8<br>8±6.8<br>7 <sup>b</sup>  | 40.53<br>±2.02<br>c  | 123.7<br>9±7.0<br>2 <sup>c</sup> | 1.51<br>±0.0<br>1 <sup>b</sup>  | 20.2<br>9±0.<br>97 <sup>c</sup> | 39.7<br>6±2.<br>03 <sup>c</sup> | 92.63±<br>4.68 <sup>b</sup>  | 227.4<br>8±10.<br>75 <sup>b</sup> | 2212.2<br>5±12.7<br>0 <sup>c</sup> |
| 15          | 54.71<br>±2.47<br>b  | 60.70<br>±1.90<br>bc | 311.6<br>9±9.1<br>5 <sup>d</sup>   | 156.4<br>4±4.3<br>2 <sup>e</sup>  | 40.11<br>±0.85<br>g              | 469.9<br>1±19.<br>98 <sup>b</sup> | 110.5<br>2±5.0<br>6 <sup>a</sup>   | 148.0<br>1±5.8<br>6 <sup>c</sup> | 24.31<br>±1.80<br>d  | 278.1<br>5±16.<br>34 <sup>b</sup> | 42.38<br>±1.56<br>c  | 93.44<br>±3.75<br>d              | 4.17<br>±0.1<br>9 <sup>c</sup>  | 22.7<br>5±1.<br>06 <sup>d</sup> | 44.4<br>3±2.<br>17 <sup>c</sup> | 92.64±<br>5.06 <sup>b</sup>  | 219.3<br>1±11.<br>38 <sup>b</sup> | 2173.6<br>7±32.7<br>0 <sup>c</sup> |
| 30          | 66.95<br>±5.02<br>de | 69.54<br>±3.36<br>e  | 298.9<br>7±11.<br>4 <sup>1ef</sup> | 171.1<br>5±4.5<br>8 <sup>cd</sup> | 47.74<br>±1.53<br>ef             | 531.5<br>2±16.<br>32 <sup>c</sup> | 120.2<br>2±5.9<br>7 <sup>bcd</sup> | 176.8<br>1±5.9<br>3 <sup>e</sup> | 21.61<br>±0.62<br>ef | 235.7<br>3±10.<br>26 <sup>b</sup> | 55.59<br>±2.34<br>de | 65.48<br>±3.21<br>f              | 10.9<br>0±0.<br>13 <sup>e</sup> | 32.4<br>5±1.<br>65 <sup>e</sup> | 69.0<br>1±3.<br>43 <sup>e</sup> | 121.4±<br>5.84 <sup>cd</sup> | 224.3<br>6±12.<br>18 <sup>b</sup> | 2319.4<br>1±37.3<br>0 <sup>b</sup> |
| 80          | 71.47<br>±1.40<br>e  | 67.30<br>±3.81<br>de | 294.3<br>3±3.9<br>8 <sup>ef</sup>  | 176.5<br>6±2.9<br>5 <sup>c</sup>  | 58.62<br>±2.04<br>c              | 530.8<br>1±25.<br>03 <sup>c</sup> | 135.1<br>9±7.1<br>0 <sup>e</sup>   | 173.8<br>2±5.9<br>2 <sup>e</sup> | 18.20<br>±1.40<br>g  | 207.4<br>5±11.<br>39 <sup>b</sup> | 66.81<br>±2.46<br>g  | 74.51<br>±1.58<br>e              | 14.0<br>0±0.<br>62 <sup>g</sup> | 39.9<br>0±1.<br>73 <sup>g</sup> | 86.2<br>4±4.<br>10 <sup>g</sup> | 136.34<br>±3.98 <sup>e</sup> | 171.0<br>6±5.6<br>7 <sup>a</sup>  | 2322.6<br>0±48.7<br>2 <sup>b</sup> |

Quantitative analysis of free amino acids was carried out according to peak area normalization. The content of free amino acids was expressed as

mg/100g dry weight. Data is presented as means ± standard deviations (n = 3). Different letters within a column are significantly different statistically (P<0.05).

**Table S3.** Dynamic changes of polyphenols during the fermentation of mulberry Jiaosu

(mg/L).

| Time/<br>d | Gallic<br>acid              | Protoc<br>atechui<br>c acid        | Chloro<br>genic<br>acid        | Vanilli<br>c acid             | Caffeic<br>acid              | Syringi<br>c acid            | P-<br>couma<br>ric acid     | Ferulic<br>acid             | Rutin                              | Total<br>conten<br>t               |
|------------|-----------------------------|------------------------------------|--------------------------------|-------------------------------|------------------------------|------------------------------|-----------------------------|-----------------------------|------------------------------------|------------------------------------|
| 0          | 0±0 <sup>a</sup>            | 24.48<br>±1.18 <sup>a</sup>        | 35.99<br>±1.46 <sup>a</sup>    | 92.4<br>±2.45 <sup>a</sup>    | 22.11<br>±1.16 <sup>a</sup>  | 117.82<br>±1.13 <sup>h</sup> | 33.41<br>±1.51 <sup>a</sup> | 41.07<br>±1.53 <sup>a</sup> | 140.92<br>±8.33 <sup>a</sup>       | 508.19<br>±13.99 <sup>a</sup>      |
| 5          | 11.54<br>±0.01 <sup>b</sup> | 55.6<br>±1.91 <sup>b</sup>         | 65.61<br>±4.51 <sup>b</sup>    | 182.12<br>±8.27 <sup>b</sup>  | 32.91<br>±0.56 <sup>b</sup>  | 165.59<br>±3.85 <sup>i</sup> | 30.65<br>±0.14 <sup>b</sup> | 46.76<br>±0.79 <sup>b</sup> | 331.18<br>±2.33 <sup>b</sup>       | 921.97<br>±20.17 <sup>b</sup>      |
| 10         | 12.24<br>±0.01 <sup>c</sup> | 140.5<br>±4.49 <sup>c</sup>        | 208.93<br>±8.15 <sup>c</sup>   | 534.25<br>±19.47 <sup>c</sup> | 41.61<br>±1.23 <sup>c</sup>  | 109.49<br>±1.13 <sup>g</sup> | 27.62<br>±0.84 <sup>c</sup> | 50.15<br>±1.9 <sup>bc</sup> | 407.68<br>±12.54 <sup>c</sup>      | 1532.4<br>5<br>±39.73 <sup>c</sup> |
| 15         | 13.17<br>±0.17 <sup>d</sup> | 167.85<br>±9.08 <sup>de</sup>      | 260.89<br>±5.18 <sup>ef</sup>  | 607.33<br>±8.13 <sup>fg</sup> | 43.13<br>±1.14 <sup>cd</sup> | 87.46<br>±2.32 <sup>f</sup>  | 31.29<br>±1.2 <sup>b</sup>  | 51.59<br>±1.3 <sup>c</sup>  | 432.61<br>±9.14 <sup>cde</sup>     | 1695.3<br>3<br>±21.49 <sup>e</sup> |
| 30         | 14.14<br>±0.15 <sup>g</sup> | 194.26<br>±10.97 <sup>g</sup><br>h | 268.09<br>±12.33 <sup>ef</sup> | 619.9<br>±13.93 <sup>g</sup>  | 49.7<br>±1.65 <sup>ef</sup>  | 69.91<br>±2.1 <sup>d</sup>   | 28.26<br>±1.7 <sup>c</sup>  | 57.29<br>±1.94 <sup>e</sup> | 438.17<br>±19.28 <sup>d</sup><br>e | 1734.7<br>3<br>±13.2 <sup>e</sup>  |
| 80         | 13.48<br>±0.33 <sup>e</sup> | 202.23<br>±6.87 <sup>h</sup>       | 238.99<br>±11 <sup>d</sup>     | 566.06<br>±8.12 <sup>d</sup>  | 49.25<br>±2.31 <sup>f</sup>  | 44.65<br>±1.87 <sup>a</sup>  | 28.43<br>±1.36 <sup>c</sup> | 52.1<br>±2.31 <sup>c</sup>  | 423.15<br>±10.51 <sup>c</sup><br>d | 1620.3<br>2<br>±37.38 <sup>d</sup> |

Data is presented as means ± standard deviations (n = 3). Different letters within a column are significantly different statistically ( $P < 0.05$ ).

**Table S4.** Microbial community diversity during the fermentation of Mulberry Jiaosu.

| Samples<br>(Days) | Shannon     |             | Simpson    |             | Ace                |                   | Chao1             |               | OTUs    |          |
|-------------------|-------------|-------------|------------|-------------|--------------------|-------------------|-------------------|---------------|---------|----------|
|                   | Fungi       | Bacteria    | Fungi      | Bacteria    | Fungi              | Bacteria          | Fungi             | Bacteria      | Fungi   | Bacteria |
| P0d               | 1.50±0.30c  | 0.46±0.13b  | 0.38±0.05a | 0.78±0.10bc | 163.00±43.43<br>b  | 75.00±58.28<br>ab | 151.00±86.3<br>8b | 47.67±23.35a  | 172±16b | 29±10a   |
| P5d               | 0.98±0.11b  | 0.70±0.17c  | 0.49±0.06a | 0.68±0.16ab | 102.00±30.35<br>ab | 58.00±18.73<br>ab | 82.67±9.07a<br>b  | 36.00±8.19a   | 54±5a   | 25±4a    |
| P10               | 0.26±0.06a  | 0.28±0.05ab | 0.91±0.02b | 0.88±0.03c  | 58.33±34.67a       | 26.33±16.20<br>a  | 48.67±26.50<br>a  | 22.33±7.09a   | 23±5a   | 16±2a    |
| P15               | 0.94±0.14b  | 0.20±0.04a  | 0.55±0.05a | 0.91±0.02c  | 90.67±20.60a<br>b  | 26.67±6.66a       | 76.00±11.53<br>ab | 20.00±2.00a   | 47±6a   | 16±1a    |
| P30               | 1.17±0.13bc | 0.38±0.08ab | 0.45±0.07a | 0.86±0.02c  | 58.00±9.17a        | 107.33±28.6<br>8b | 57.00±8.89a       | 106.33±31.09b | 55±8a   | 95±28b   |
| P80               | 0.30±0.39a  | 1.08±0.05d  | 0.87±0.19b | 0.57±0.06a  | 35.67±23.46a       | 231.33±8.50<br>c  | 28.00±11.00<br>a  | 225.00±11.53c | 21±5a   | 209±12c  |

Data are presented as means ± standard deviations (n = 3). Values with different letters within a column are significantly different statistically (P < 0.05).

OTUs, operational taxonomic units.

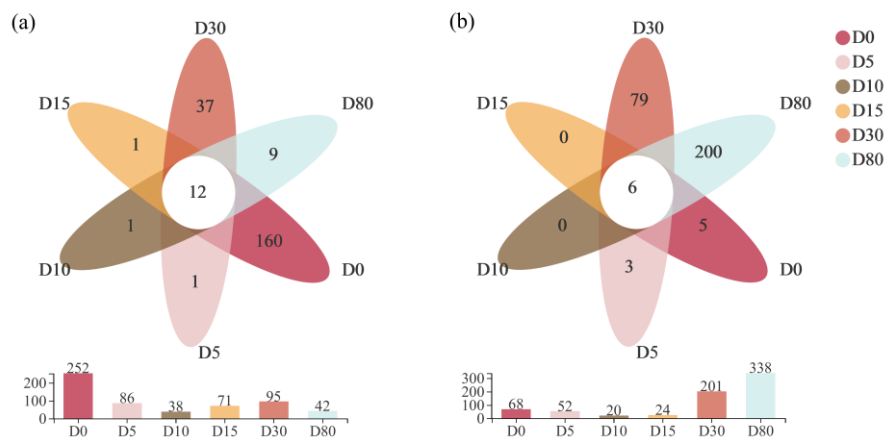

**Figure S1.** OTUs Venn plot of fungi (a) and bacteria (b).

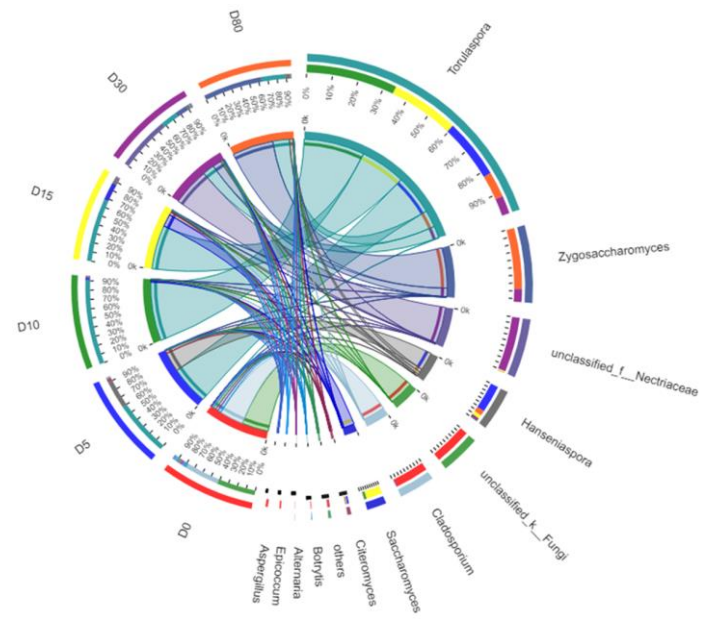

**Figure S2.** The distribution of the fungi at the gene level in mulberry Jiaosu.

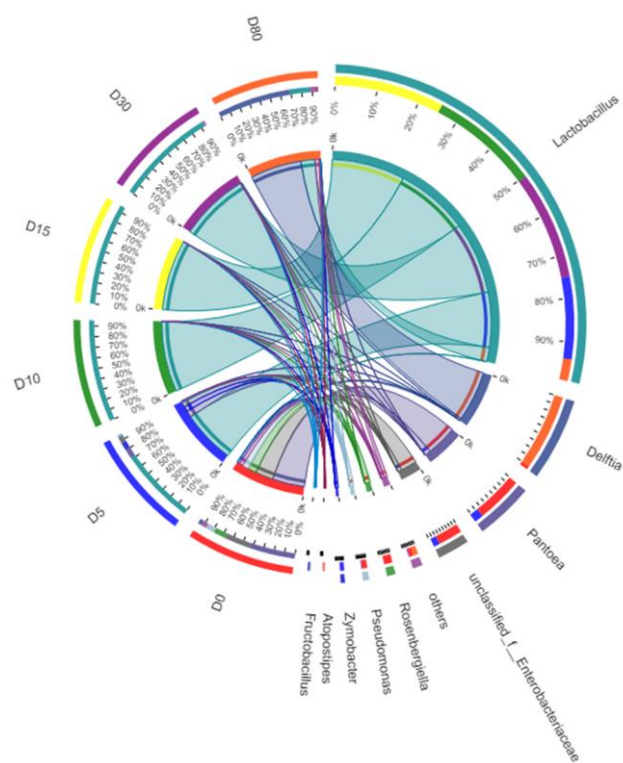

**Figure S3.** The distribution of the bacteria at the gene level in mulberry Jiaosu.

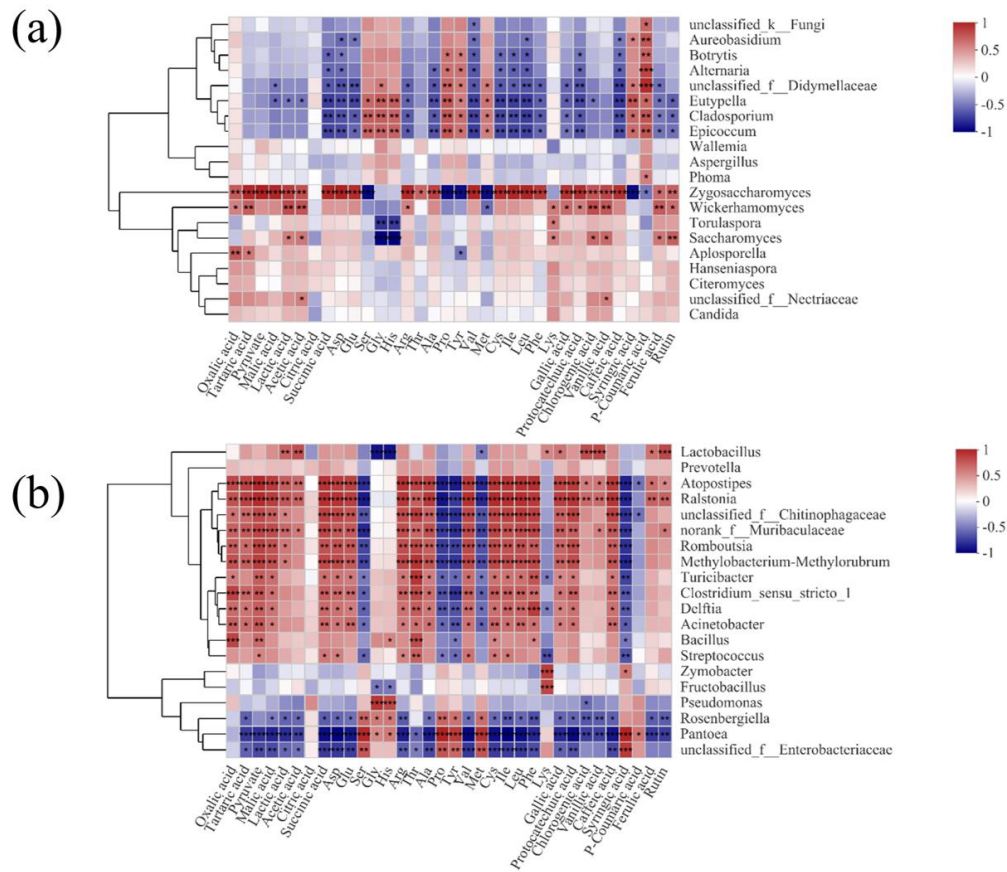

**Figure S4.** Correlation analysis between dominant fungal (a) and bacterial (b) genera with bioactive compounds. Red represents a positive correlation and blue represents a negative correlation. The darker the color, the greater the correlation.
